# Supplementary material for: N-Heterocyclic carbene-catalyzed [4 + 1] annulation of phthalaldehyde and imines
Source: Royal Society of Chemistry journal article supplement (doi:10.1039/c1ob05092c), 2011-01-01
Supplement: c1ob05092c.pdf [file c1ob05092c.pdf]

## Supporting Information

### N-Heterocyclic Carbene-Catalyzed [4+1] Annulation of Phthalaldehyde and Imines

Fang-Gang Sun and Song Ye \*

*Beijing National Laboratory for Molecular Sciences, CAS Key Laboratory of  
Molecular Recognition and Function, Institute of Chemistry, Chinese Academy of  
Sciences, Beijing 100190, China*

*songye@iccas.ac.cn*

### Table of Contents

|                                                                                                           |    |
|-----------------------------------------------------------------------------------------------------------|----|
| Part I Experimental part .....                                                                            | 1  |
| General Information .....                                                                                 | 1  |
| 1.1 Synthesis of <i>cis</i> -indanones via a Cascade Stetter-Aldol Reaction Catalyzed by NHC <b>4a</b> .. | 1  |
| 1.2 Synthesis of isoquinolinone .....                                                                     | 7  |
| 1.3 X-ray Crystal Structure .....                                                                         | 9  |
| References .....                                                                                          | 10 |
| Part II Copy of NMR Spectra .....                                                                         | 11 |

## Part I Experimental part

### General Information

All reactions were carried out under an argon atmosphere in oven-dried glassware with magnetic stirring. CH<sub>2</sub>Cl<sub>2</sub> and CH<sub>3</sub>CN were distilled from CaH<sub>2</sub>. Phthalaldehyde was used after recrystallization from petroleum ether. *tert*-Butyl aryl(phenylsulfonyl)methylcarbamate<sup>1</sup> were prepared according to the literatures. Column chromatograph was performed on silica gel 200 ~ 300 mesh. All <sup>1</sup>H NMR (300 MHz), <sup>13</sup>C NMR (75 MHz) spectra were recorded in CDCl<sub>3</sub>, with tetramethylsilane as an internal standard and reported in parts per million (ppm, δ). <sup>1</sup>H NMR Spectroscopy splitting patterns were designated as singlet (s), doublet (d), triplet (t). Splitting patterns that could not be interpreted or easily visualized were designated as multiplet (m) or broad (br). Infrared spectra were reported as wavenumber (cm<sup>-1</sup>).

### 1.1 Synthesis of *cis*-indanones via a Cascade Stetter-Aldol Reaction Catalyzed by NHC 4a

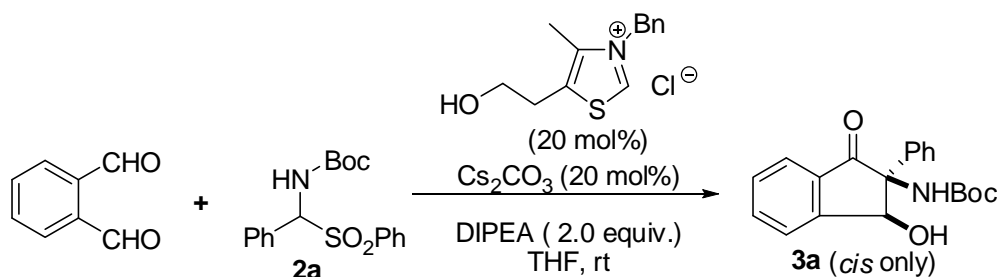

**Typical procedure.** To an oven-dried 50 mL Schlenk tube equipped with a stir bar was charged with thiazolium salt (26.9 mg, 0.1 mmol) and Cs<sub>2</sub>CO<sub>3</sub> (32.6 mg, 0.1 mmol). The tube was closed with a septum, evacuated, and back-filled with argon. To

this mixture was added distilled solvent 5 mL, then stirred for 10 min at room temperature. DIPEA (173.9  $\mu\text{L}$ , 1 mmol), *tert*-butyl phenyl(phenylsulfonyl) methylcarbamate (173.5 mg, 0.5 mmol), and phthalaldehyde (100.5 mg, 0.75 mmol) was added to the tube. The mixture was further stirred for overnight, then diluted with ethyl acetate and passed through a short silica pad. The solvent was removed under reduced pressure and the residue was purified by chromatography on silica gel (ethyl acetate/petroleum ether) to give the desired product.

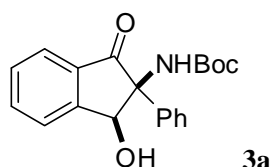

***tert*-butyl-1-hydroxy-3-oxo-2-phenyl-2,3-dihydro-1H-inden-2-ylcarbamate**

Purified with petroleum ether/ethyl acetate (3/1), yielding 78.5 mg (76%) of *cis*-**3a** as a white solid,  $R_f = 0.17$  (petroleum ether/ethyl acetate = 3/1), mp: 125-127  $^{\circ}\text{C}$ .  $^1\text{H}$  NMR (300 MHz,  $\text{CDCl}_3$ )  $\delta$  7.82-7.74 (m, 3H), 7.57-7.52 (m, 1H), 7.30-7.22 (m, 5H), 5.78 (b, 1H), 5.65 (d,  $J = 6.6$  Hz, 1H), 3.94 (b, 1H), 1.45 (s, 9H);  $^{13}\text{C}$  NMR (75 MHz,  $\text{CDCl}_3$ )  $\delta$  200.3, 156.8, 152.2, 138.7, 136.1, 133.7, 130.0, 128.6, 127.7, 126.8, 125.5, 124.7, 80.8, 77.6, 70.3, 28.0; IR (KBr)  $\nu$  1723, 1696, 1163, 699; EIMS  $m/z$ : 339 (10.0), 222 (100); HRMS-(EI) ( $m/z$ ):  $\text{M}^+$  calcd for  $\text{C}_{20}\text{H}_{21}\text{NO}_4$ , 339.1471; found 339.1474.

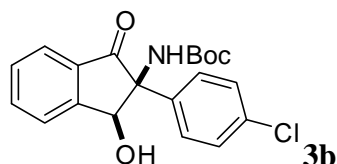

***tert*-butyl-2-(4-chlorophenyl)-1-hydroxy-3-oxo-2,3-dihydro-1H-inden-2-ylcarbamate**

Purified with petroleum ether/ethyl acetate (3/1), yielding 78.5 mg (83%) of *cis*-**3a** as

a waxy solid,  $R_f = 0.30$  (petroleum ether/ethyl acetate = 3/1).  $^1\text{H}$  NMR (300 MHz,  $\text{CDCl}_3$ )  $\delta$  7.80-7.75 (m, 3H), 7.57-7.52 (m, 1H), 7.26-7.22 (m, 2H), 7.15 (d,  $J = 8.7$  Hz, 2H), 5.81 (b, 1H), 5.64 (d,  $J = 5.7$  Hz, 1H), 3.85 (b, 1H), 1.44 (s, 9H);  $^{13}\text{C}$  NMR (75 MHz,  $\text{CDCl}_3$ )  $\delta$  200.0, 156.8, 152.3, 137.3, 136.6, 134.0, 133.7, 130.5, 129.0, 127.1, 126.0, 125.2, 81.3, 77.3, 70.2, 28.2; IR (KBr)  $\nu$  1722, 1703, 1165; EIMS  $m/z$ : 373 (4.0), 256 (100); HRMS-(EI) ( $m/z$ ):  $M^+$  calcd for  $\text{C}_{20}\text{H}_{20}\text{NO}_4\text{Cl}$ , 373.1081; found 373.1086.

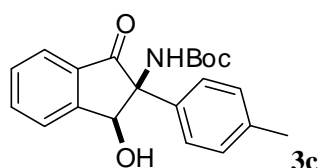

***tert*-butyl-1-hydroxy-3-oxo-2-p-tolyl-2,3-dihydro-1H-inden-2-ylcarbamate**

Purified with petroleum ether/ethyl acetate (3/1), yielding 78.5 mg (56%) of *cis*-**3a** as a waxy solid,  $R_f = 0.23$  (petroleum ether/ethyl acetate = 3/1).  $^1\text{H}$  NMR (300 MHz,  $\text{CDCl}_3$ )  $\delta$  7.79-7.71 (m, 3H), 7.53-7.48 (m, 1H), 7.13-7.04 (m, 4H), 5.79 (b, 1H), 5.63 (d,  $J = 6.9$  Hz, 1H), 3.96 (b, 1H), 2.25 (s, 3H), 1.44 (s, 9H);  $^{13}\text{C}$  NMR (75 MHz,  $\text{CDCl}_3$ )  $\delta$  200.7, 157.2, 152.4, 137.9, 136.3, 135.9, 134.0, 130.3, 129.6, 127.1, 125.6, 124.9, 81.1, 78.0, 70.3, 28.2, 20.9; IR (KBr)  $\nu$  1727, 1702, 704; EIMS  $m/z$ : 353 (8.0), 226 (100); HRMS-(EI) ( $m/z$ ):  $M^+$  calcd for  $\text{C}_{21}\text{H}_{23}\text{NO}_4$ , 353.1627; found 353.1630.

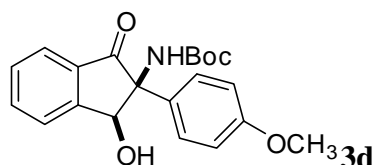

***tert*-butyl-1-hydroxy-2-(4-methoxyphenyl)-3-oxo-2,3-dihydro-1H-inden-2-ylcarbamate**

Purified with petroleum ether/ethyl acetate (3/1), yielding 78.5 mg (40%) of *cis*-**3a** as

a waxy solid,  $R_f = 0.20$  (petroleum ether/ethyl acetate = 3/1).  $^1\text{H}$  NMR (300 MHz,  $\text{CDCl}_3$ )  $\delta$  7.81-7.72 (m, 3H), 7.55-7.50 (m, 1H), 7.16 (d,  $J = 8.7$  Hz, 2H), 6.79 (d,  $J = 9.0$  Hz, 2H), 5.74 (b, 1H), 5.63 (d,  $J = 6.3$  Hz, 1H), 3.92 (b, 1H), 3.73 (s, 3H), 1.44 (s, 9H);  $^{13}\text{C}$  NMR (75 MHz,  $\text{CDCl}_3$ )  $\delta$  200.7, 159.3, 157.3, 152.3, 136.3, 134.0, 130.8, 130.3, 127.1, 127.0, 124.9, 114.3, 81.2, 78.0, 70.0, 55.3, 28.2; IR (KBr)  $\nu$  1723, 1701, 1162; EIMS  $m/z$ : 369 (50.0), 251 (100); HRMS-(EI) ( $m/z$ ):  $\text{M}^+$  calcd for  $\text{C}_{21}\text{H}_{23}\text{NO}_5$ , 369.1576; found 369.1581.

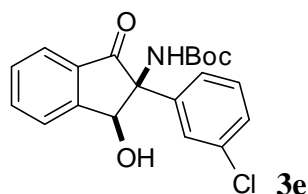

***tert*-butyl-2-(3-chlorophenyl)-1-hydroxy-3-oxo-2,3-dihydro-1H-inden-2-ylcarbamate**

Purified with petroleum ether/ethyl acetate (3/1), yielding 78.5 mg (87%) of *cis*-3a as a white solid,  $R_f = 0.24$  (petroleum ether/ethyl acetate = 3/1), mp: 132-134 oC.  $^1\text{H}$  NMR (300 MHz,  $\text{CDCl}_3$ )  $\delta$  7.80-7.76 (m, 3H), 7.57-7.53 (m, 1H), 7.26-7.15 (m, 3H), 7.05 (d,  $J = 6.6$  Hz, 1H), 5.84 (b, 1H), 5.64 (d,  $J = 5.1$  Hz, 1H), 3.91 (b, 1H), 1.45 (s, 9H);  $^{13}\text{C}$  NMR (75 MHz,  $\text{CDCl}_3$ )  $\delta$  199.9, 156.9, 152.3, 140.8, 136.7, 135.0, 133.7, 130.6, 130.1, 128.3, 127.2, 125.9, 125.2, 123.8, 81.5, 77.3, 70.2, 28.2; IR (KBr)  $\nu$  1720, 1694, 1161, 696; EIMS  $m/z$ : 373 (4.0), 256 (100); HRMS-(EI) ( $m/z$ ):  $\text{M}^+$  calcd for  $\text{C}_{20}\text{H}_{20}\text{NO}_4\text{Cl}$ , 373.1081; found 373.1084.

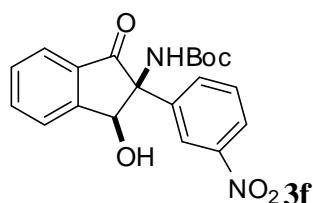

***tert*-butyl-1-hydroxy-2-(3-nitrophenyl)-3-oxo-2,3-dihydro-1H-inden-2-ylcarbamate**

Purified with petroleum ether/ethyl acetate (3/1), yielding 78.5 mg (91%) of *cis*-**3a** as a white solid,  $R_f = 0.17$  (petroleum ether/ethyl acetate = 3/1), mp: 99-100 °C.  $^1\text{H}$  NMR (300 MHz,  $\text{CDCl}_3$ )  $\delta$  8.14-8.09 (m, 2H), 7.91-7.81 (m, 3H), 7.63-7.58 (m, 1H), 7.45 (d,  $J = 7.2$  Hz, 2H), 5.93 (b, 1H), 5.76 (d,  $J = 5.4$  Hz, 1H), 3.74 (b, 1H), 1.48 (s, 9H);  $^{13}\text{C}$  NMR (75 MHz,  $\text{CDCl}_3$ )  $\delta$  199.0, 156.4, 152.1, 148.5, 140.9, 136.9, 133.3, 131.4, 130.7, 129.7, 127.1, 125.4, 122.9, 120.7, 81.7, 77.4, 70.2, 28.2; IR (KBr)  $\nu$  1719, 1703, 1159, 702; EIMS  $m/z$ : 384 (4.0), 267 (100); HRMS-(EI) ( $m/z$ ):  $\text{M}^+$  calcd for  $\text{C}_{20}\text{H}_{20}\text{N}_2\text{O}_6$ , 384.1321; found 384.1326.

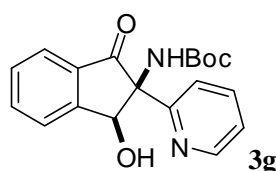

***tert*-butyl-1-hydroxy-3-oxo-2-(pyridin-2-yl)-2,3-dihydro-1H-inden-2-ylcarbamate**

Purified with petroleum ether/ethyl acetate (3/1), yielding 78.5 mg (87%) of *cis*-**3a** as a waxy solid,  $R_f = 0.17$  (petroleum ether/ethyl acetate = 3/1).  $^1\text{H}$  NMR (300 MHz,  $\text{CDCl}_3$ )  $\delta$  8.52 (d,  $J = 4.2$  Hz, 1H), 7.87-7.77 (m, 3H), 7.57 (t,  $J = 7.5$  Hz, 2H), 7.37 (b, 1H), 7.21-7.17 (m, 1H), 6.84 (d,  $J = 7.8$  Hz, 1H), 5.41 (d,  $J = 10.2$  Hz, 1H), 4.04 (d,  $J = 10.2$  Hz, 1H), 1.46 (s, 9H);  $^{13}\text{C}$  NMR (75 MHz,  $\text{CDCl}_3$ )  $\delta$  200.7, 158.1, 155.7, 153.7, 148.3, 137.5, 136.4, 134.4, 130.2, 127.3, 124.7, 123.0, 119.8, 81.1, 78.3, 70.4, 28.2; IR (KBr)  $\nu$  1725, 1697, 1165, 701; EIMS  $m/z$ : 340 (5.0), 223 (100); HRMS-(EI) ( $m/z$ ):  $\text{M}^+$  calcd for  $\text{C}_{19}\text{H}_{20}\text{N}_2\text{O}_4$ , 340.1423; found 340.1425.

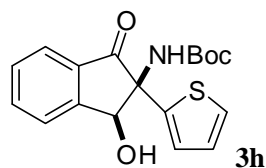

***tert*-butyl-1-hydroxy-3-oxo-2-(thiophen-2-yl)-2,3-dihydro-1H-inden-2-ylcarbamate**

Purified with petroleum ether/ethyl acetate (3/1), yielding 78.5 mg (93%) of *cis*-**3a** as a white solid,  $R_f = 0.16$  (petroleum ether/ethyl acetate = 3/1), mp: 135-136 °C.  $^1\text{H}$  NMR (300 MHz,  $\text{CDCl}_3$ )  $\delta$  7.83-7.73 (m, 3H), 7.55 (t,  $J = 6.9$  Hz, 1H), 7.18 (d,  $J = 4.5$  Hz, 1H), 6.85-6.73 (m, 2H), 5.89 (b, 1H), 5.73 (d,  $J = 4.5$  Hz, 1H), 3.96 (b, 1H), 1.46 (s, 9H);  $^{13}\text{C}$  NMR (75 MHz,  $\text{CDCl}_3$ )  $\delta$  198.5, 156.8, 151.7, 142.8, 136.4, 133.1, 130.5, 127.4, 127.2, 125.6, 125.3, 125.1, 81.4, 78.3, 68.4, 28.2; IR (KBr)  $\nu$  1727, 1694, 1163, 703; EIMS  $m/z$ : 345 (4.0), 228 (100); HRMS-(EI) ( $m/z$ ):  $\text{M}^+$  calcd for  $\text{C}_{18}\text{H}_{19}\text{NO}_4\text{S}$ , 345.1035; found 345.1039.

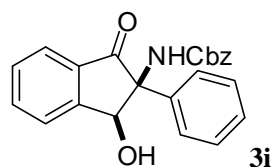

**benzyl-1-hydroxy-3-oxo-2-phenyl-2,3-dihydro-1H-inden-2-ylcarbamate**

Purified with petroleum ether/ethyl acetate (3/1), yielding 78.5 mg (66%) of *cis*-**3a** as a waxy solid,  $R_f = 0.19$  (petroleum ether/ethyl acetate = 3/1).  $^1\text{H}$  NMR (300 MHz,  $\text{CDCl}_3$ )  $\delta$  7.82-7.74 (m, 3H), 7.54 (t,  $J = 7.2$  Hz, 1H), 7.35-7.23 (m, 11H), 6.07 (b, 1H), 5.72 (d,  $J = 5.7$  Hz, 1H), 5.13 (s, 2H), 3.66 (d,  $J = 5.7$  Hz, 1H);  $^{13}\text{C}$  NMR (75 MHz,  $\text{CDCl}_3$ )  $\delta$  200.0, 157.4, 152.3, 138.4, 136.5, 135.8, 133.9, 130.5, 129.0, 128.6, 128.4, 128.2, 128.0, 127.1, 125.6, 125.1, 77.7, 70.6, 67.6; IR (KBr)  $\nu$  1718, 1700,

1654, 697; EIMS  $m/z$ : 373 (4.0), 108 (100); HRMS-(EI) ( $m/z$ ):  $M^+$  calcd for  $C_{23}H_{19}NO_4$ , 373.1314; found 373.1318.

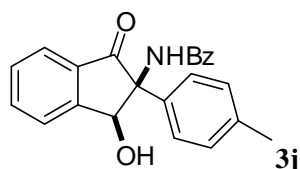

### N-(1-hydroxy-3-oxo-2-p-tolyl-2,3-dihydro-1H-inden-2-yl)benzamide

Purified with petroleum ether/ethyl acetate (3/1), yielding 78.5 mg (53%) of *cis*-**3a** as a white solid,  $R_f = 0.20$  (petroleum ether/ethyl acetate = 3/1), mp: 107-108 °C.  $^1H$  NMR (300 MHz,  $CDCl_3$ )  $\delta$  7.92-7.76 (m, 5H), 7.57 (t,  $J = 7.2$  Hz, 2H), 7.48 (t,  $J = 7.2$  Hz, 2H), 7.30 (s, 1H), 7.19 (d,  $J = 8.4$  Hz, 2H), 7.09 (d,  $J = 8.4$  Hz, 2H), 5.89 (d,  $J = 6.9$  Hz, 1H), 3.90 (d,  $J = 6.9$  Hz, 1H), 2.27 (s, 3H);  $^{13}C$  NMR (75 MHz,  $CDCl_3$ )  $\delta$  200.6, 169.1, 152.3, 138.2, 136.5, 135.3, 133.9, 133.1, 132.4, 130.4, 129.8, 128.8, 127.4, 127.2, 125.7, 125.0, 78.0, 71.3, 21.0; IR (KBr)  $\nu$  1729, 1700, 1644, 1385, 696; EIMS  $m/z$ : 357 (4.0), 105 (100); HRMS-(EI) ( $m/z$ ):  $M^+$  calcd for  $C_{23}H_{19}NO_3$ , 357.1365; found 357.1370.

## 1.2 Synthesis of isoquinolinone **6**<sup>2</sup>

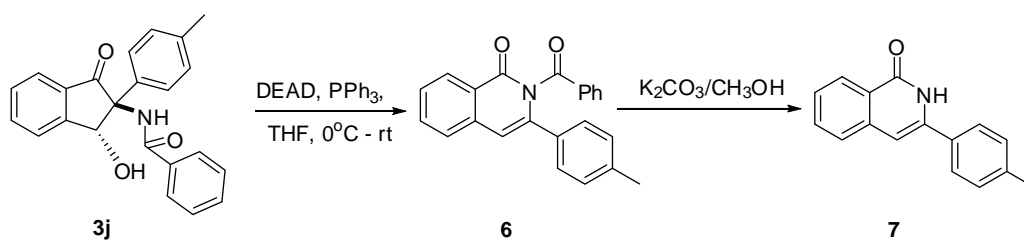

### 2-benzoyl-3-p-tolylisoquinolin-1(2H)-one (**6**)



To an oven-dried 25 mL Schlenk tube equipped with a stir bar was charged with the indanone (76 mg, 0.213 mmol) and PPh<sub>3</sub> (83.6 mg, 0.319 mmol). The tube was closed with a septum, evacuated, and back-filled with argon. To this mixture was added distilled solvent THF(2 mL), then the mixture was cooled to 0°C. DEAD(55.6 mg, 0.319 mmol) was added to the tube. The mixture was further stirred for 1h at 0°C, then 2h at room temperature. The solvent was removed under reduced pressure and the residue was purified by chromatography on silica gel (ethyl acetate/petroleum ether) to give the desired product.

Purified with petroleum ether/ethyl acetate (10/1), yielding 59.9 mg (83%) as a waxy solid,  $R_f = 0.35$  (petroleum ether/ethyl acetate = 10/1). <sup>1</sup>H NMR (300 MHz, CDCl<sub>3</sub>) δ 8.37 (d,  $J = 7.2$  Hz, 2H), 8.03-7.91 (m, 5H), 7.71 (t,  $J = 7.5$  Hz, 1H), 7.61-7.51 (m, 3H), 7.28 (d,  $J = 8.1$  Hz, 2H), 2.41 (s, 3H); <sup>13</sup>C NMR (75 MHz, CDCl<sub>3</sub>) δ 165.0, 155.6, 149.6, 139.9, 138.8, 135.7, 134.0, 131.1, 130.6, 129.5, 129.1, 128.7, 127.5, 127.2, 126.9, 123.7, 120.6, 115.5, 21.3; IR (KBr)  $\nu$  1654, 1364, 613; EIMS  $m/z$ : 339 (50.0), 235 (100); HRMS-(EI) ( $m/z$ ): M<sup>+</sup> calcd for C<sub>23</sub>H<sub>17</sub>NO<sub>2</sub>, 339.1259; found 339.1264.

### **3-p-tolyloisoquinolin-1(2H)-one (7)**

To an 10mL rounded-bottom flask equipped with a stir bar was added isoquinolinone (40mg, 0.118 mmol) and CH<sub>3</sub>OH (1mL) .Then, K<sub>2</sub>CO<sub>3</sub>(32.6 mg, 0.236 mmol) was added to the mixture. The stirring was continuing for 3h. The solvent was removed under reduced pressure and the residue was purified by chromatography on silica gel

(ethyl acetate/petroleum ether) to give the desired product.

Purified with petroleum ether/ethyl acetate (3/1-1/1), yielding 26.4 mg (95%) as a white solid,  $R_f = 0.23$  (petroleum ether/ethyl acetate = 3/1), mp: 239-240°C.  $^1\text{H}$  NMR (300 MHz,  $\text{CDCl}_3$ )  $\delta$  10.06 (s, 1H), 8.41 (d,  $J = 8.1$  Hz, 1H), 7.70-7.57 (m, 4H), 7.50-7.45 (m, 1H), 7.32 (d,  $J = 8.1$  Hz, 2H), 6.76 (s, 1H), 2.43 (s, 3H);  $^{13}\text{C}$  NMR (75 MHz,  $\text{CDCl}_3$ )  $\delta$  163.9, 139.8, 139.5, 138.4, 132.8, 131.5, 129.9, 127.5, 126.5, 126.0, 124.9, 103.8, 21.3; IR (KBr)  $\nu$  1739, 1154, 810.

### 1.3 X-ray Crystal Structure

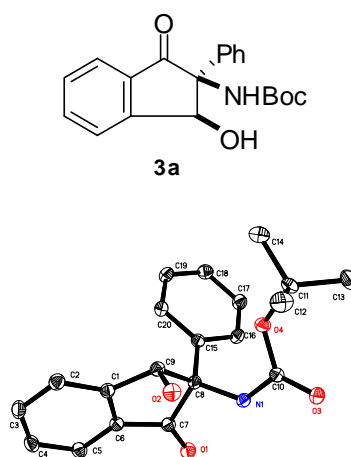

**Figure S1.** X-Ray crystal structure of *cis*-**3a**

A colorless solution of **3a** in EtOAc was prepared. Crystals suitable for X-ray structural analysis were obtained by slow evaporation of the solvents at room temperature.

## References

1. (a) C. Rampalagos and W. D. Wulff, *Adv. Synth. Catal.*, 2008, **350**, 1785. (b) M. D. Smith, C. R. Jones, P. G. Dan and A. J. Morrison, *Angew. Chem. Int. Ed.*, 2009, **48**, 7391. (c) T. Ollevier and Z. Li, *Adv. Synth. Catal.*, 2009, **351**, 3251.
2. W.-J. Cho, M.-J. Park, B.-H. Chung and C.-O. Lee, *Bioorg. Med. Chem. Lett.*, 1998, **8**, 41-46.

## Part II Copy of NMR Spectra

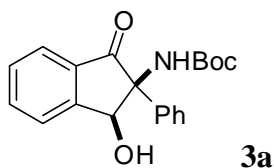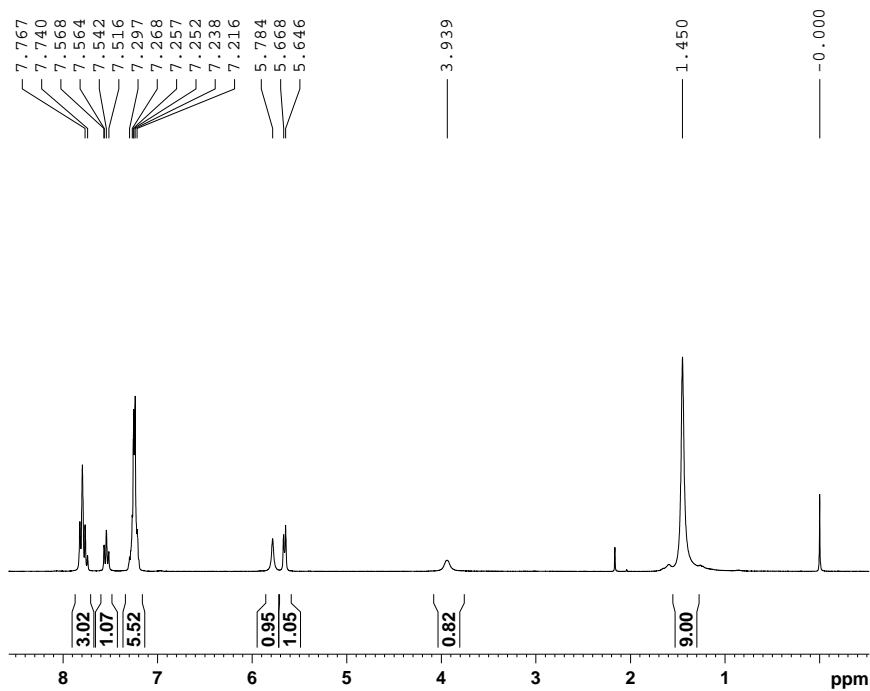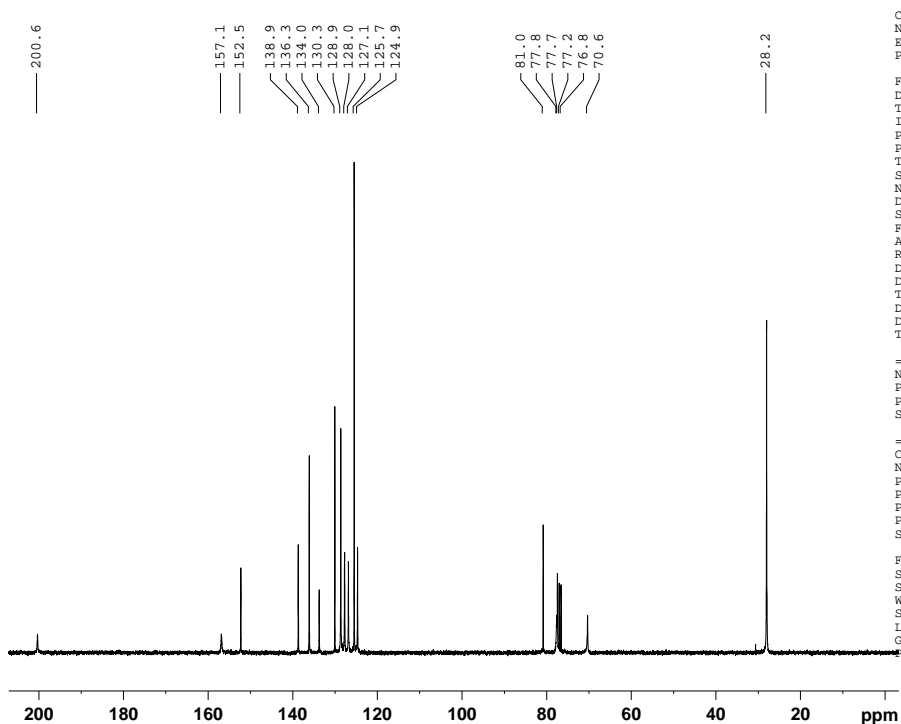

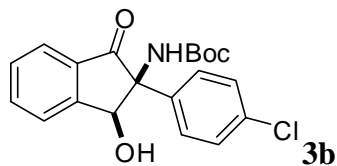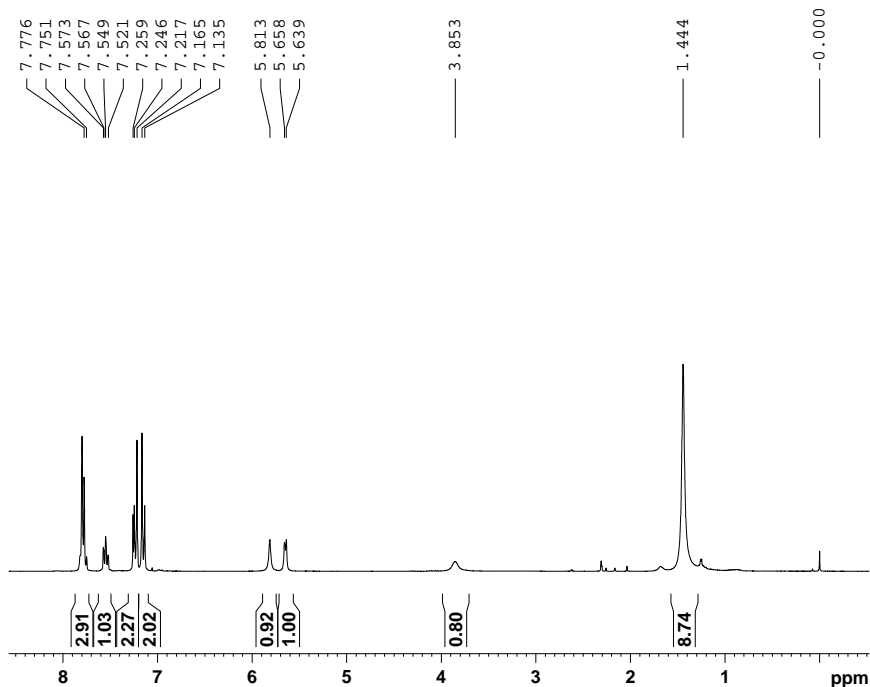

```
Current Data Parameters
NAME      sf9-593
EXPNO    10
PROCNO    1

F2 - Acquisition Parameters
Date_    20100906
Time     8.28
INSTRUM  spect
PROBHD   5 mm DUL 13C-1
PULPROG  zg30
TD       65536
SOLVENT  cdcl3
NS       16
DS       0
SWH      8992.806 Hz
FIDRES   0.137219 Hz
AQ       3.6438515 sec
RG       128
DW       55.600 usec
DE       8.00 usec
TE       301.1 K
D1       1.00000000 sec
TD0      1
```

```
===== CHANNEL f1 =====
NUC1      1H
P1        10.80 usec
PL1       3.00 dB
SFO1     300.1324010 MHz

F2 - Processing parameters
SI        32768
SF        300.1300061 MHz
WDW       EM
SSB       0
LB        0.30 Hz
GB        0
PC        1.00
```

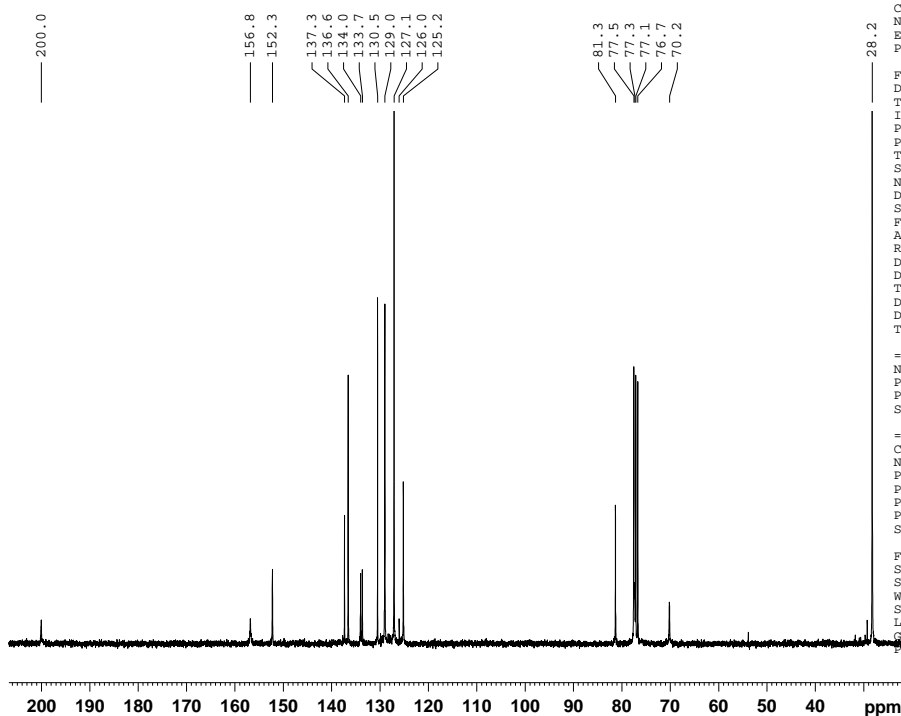

```
Current Data Parameters
NAME      sf9-593
EXPNO    11
PROCNO    1

F2 - Acquisition Parameters
Date_    20101027
Time     23.38
INSTRUM  spect
PROBHD   5 mm DUL 13C-1
PULPROG  zgpg30
TD       65536
SOLVENT  CDCl3
NS       420
DS       4
SWH      17985.611 Hz
FIDRES   0.274439 Hz
AQ       1.8219508 sec
RG       5792.6
DW       27.800 usec
DE       8.00 usec
TE       297.9 K
D1       2.00000000 sec
D11      0.03000000 sec
TD0      1
```

```
===== CHANNEL f1 =====
NUC1      13C
P1        12.50 usec
PL1       2.00 dB
SFO1     75.4752953 MHz

===== CHANNEL f2 =====
CPDPRG2  waltz16
NUC2      1H
PCPD2    100.00 usec
PL2       3.00 dB
PL12     22.33 dB
PL13     23.00 dB
SFO2     300.1312005 MHz
```

```
F2 - Processing parameters
SI        32768
SF        75.4677490 MHz
WDW       EM
SSB       0
LB        1.00 Hz
GB        0
PC        1.40
```

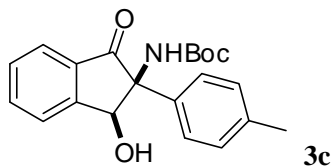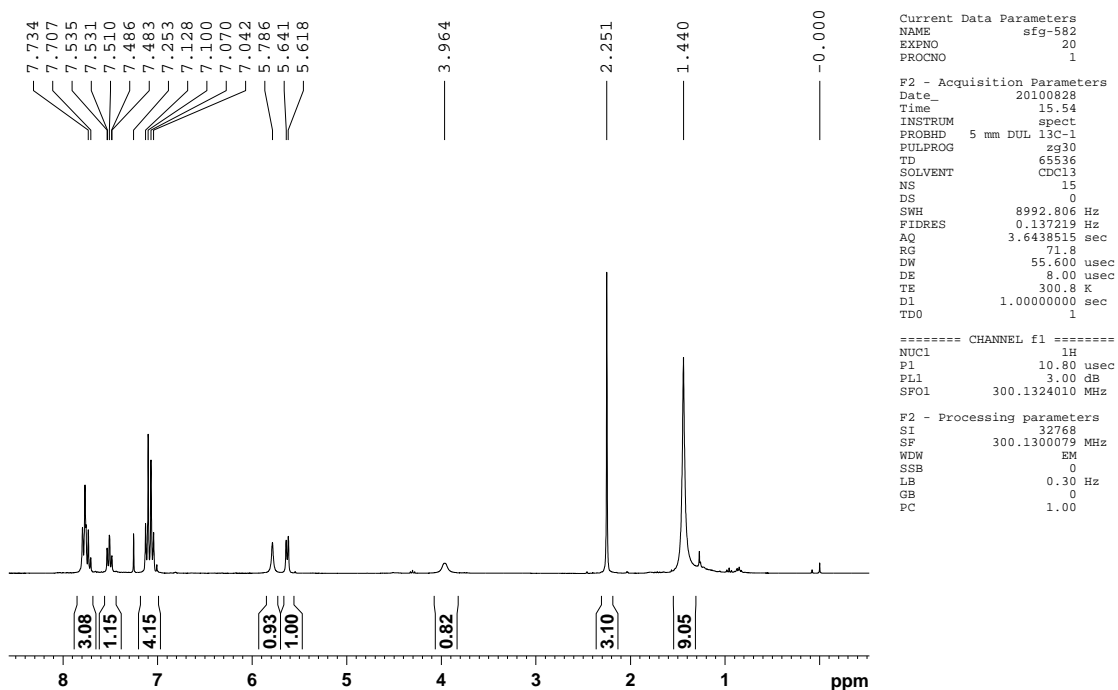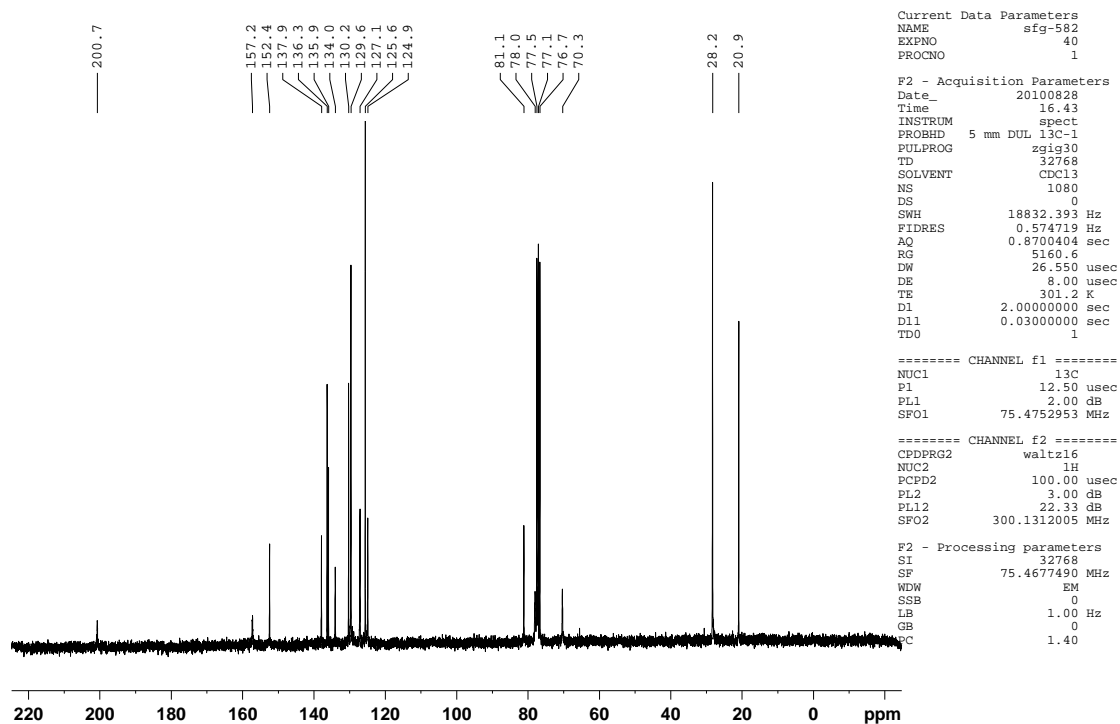

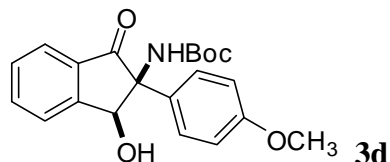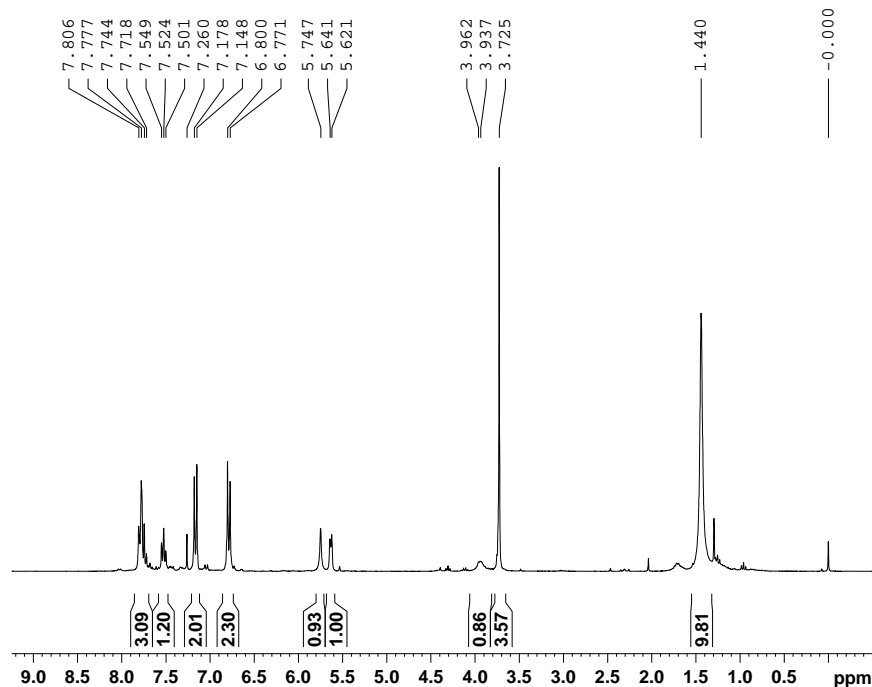

```

Current Data Parameters
NAME          sf9-583
EXPNO         10
PROCNO        1

F2 - Acquisition Parameters
Date_         20100903
Time          16.42
INSTRUM       spect
PROBHD        5 mm DUL 13C-1
PULPROG       zg30
TD            65536
SOLVENT       CDCl3
NS            16
DS            0
SWH           8992.806 Hz
FIDRES        0.137219 Hz
AQ            3.6438515 sec
RG            128
DW            55.600 usec
DE            8.00 usec
TE            301.2 K
D1            1.00000000 sec
TD0           1

===== CHANNEL f1 =====
NUC1           1H
P1            10.80 usec
PL1           3.00 dB
SFO1          300.1324010 MHz

F2 - Processing parameters
SI            32768
SF           300.1300058 MHz
WDW           EM
SSB           0
LB            0.30 Hz
GB            0
PC            1.00
    
```

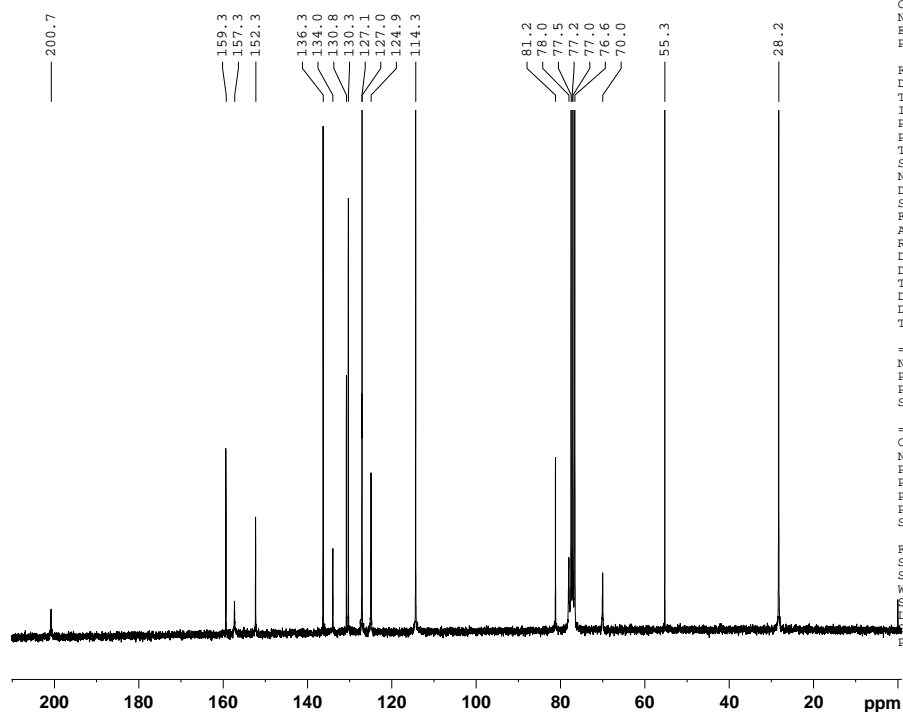

```

Current Data Parameters
NAME          sf9-583
EXPNO         20
PROCNO        1

F2 - Acquisition Parameters
Date_         20101028
Time          0.13
INSTRUM       spect
PROBHD        5 mm DUL 13C-1
PULPROG       zgpg30
TD            65536
SOLVENT       CDCl3
NS            6925
DS            4
SWH           17985.611 Hz
FIDRES        0.274439 Hz
AQ            1.8219508 sec
RG            5792.6
DW            27.800 usec
DE            8.00 usec
TE            298.0 K
D1            2.00000000 sec
D11           0.03000000 sec
TD0           1

===== CHANNEL f1 =====
NUC1           13C
P1            12.50 usec
PL1           2.00 dB
SFO1          75.4752953 MHz

===== CHANNEL f2 =====
CPDPRG2       waltz16
NUC2           1H
PCPD2         100.00 usec
PL2           3.00 dB
PL12          22.33 dB
PL13          23.00 dB
SFO2          300.1312005 MHz

F2 - Processing parameters
SI            32768
SF           75.4677490 MHz
WDW           EM
SSB           0
LB            1.00 Hz
GB            0
PC            1.40
    
```

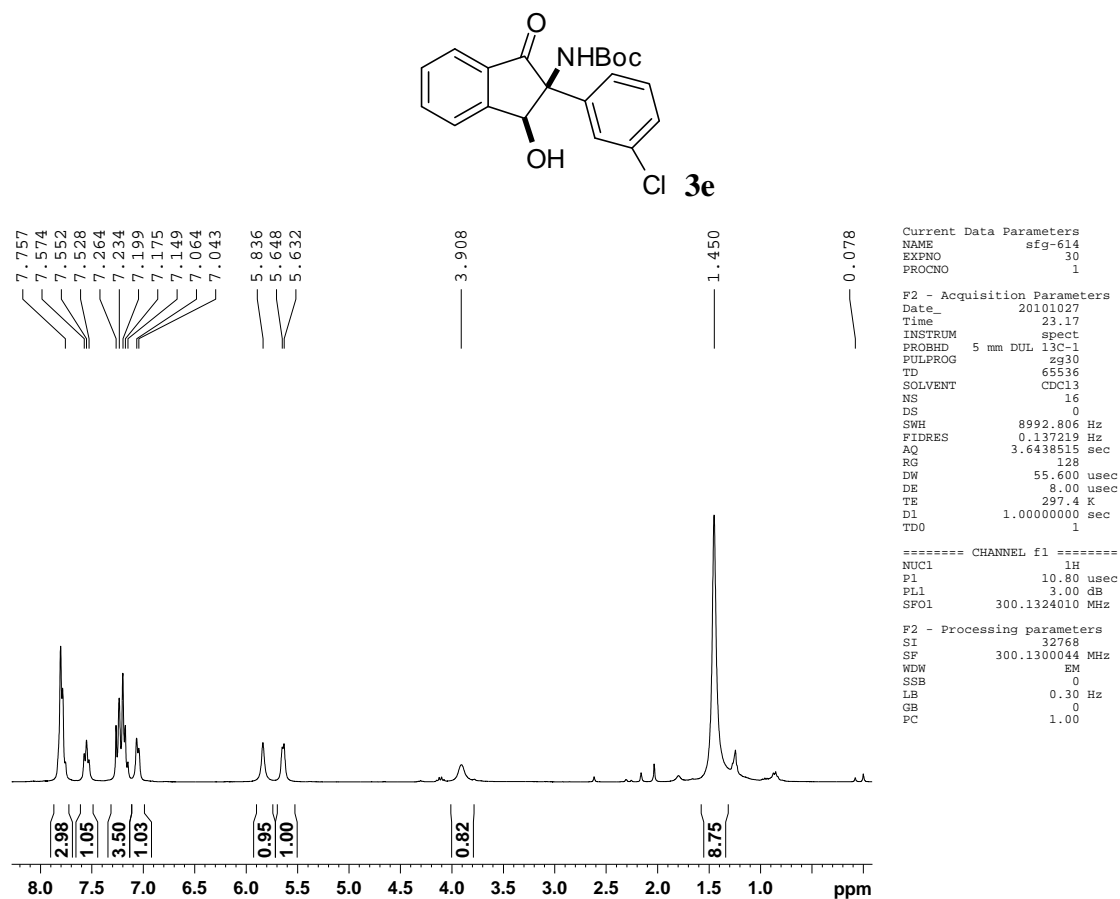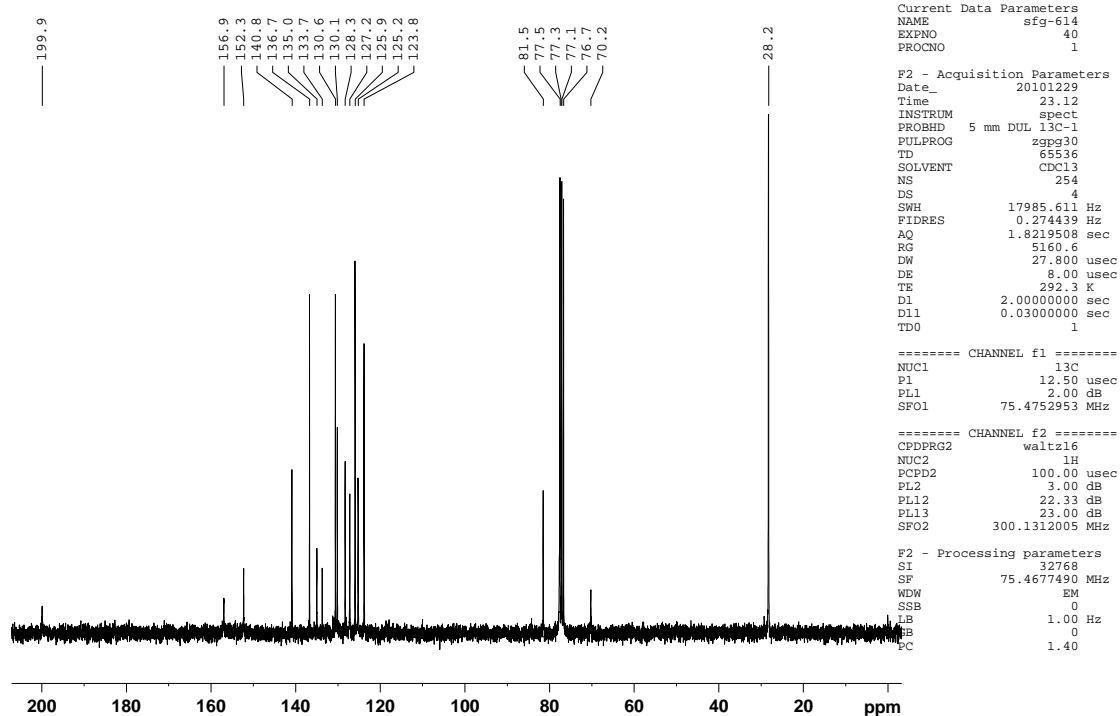



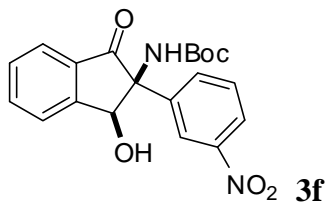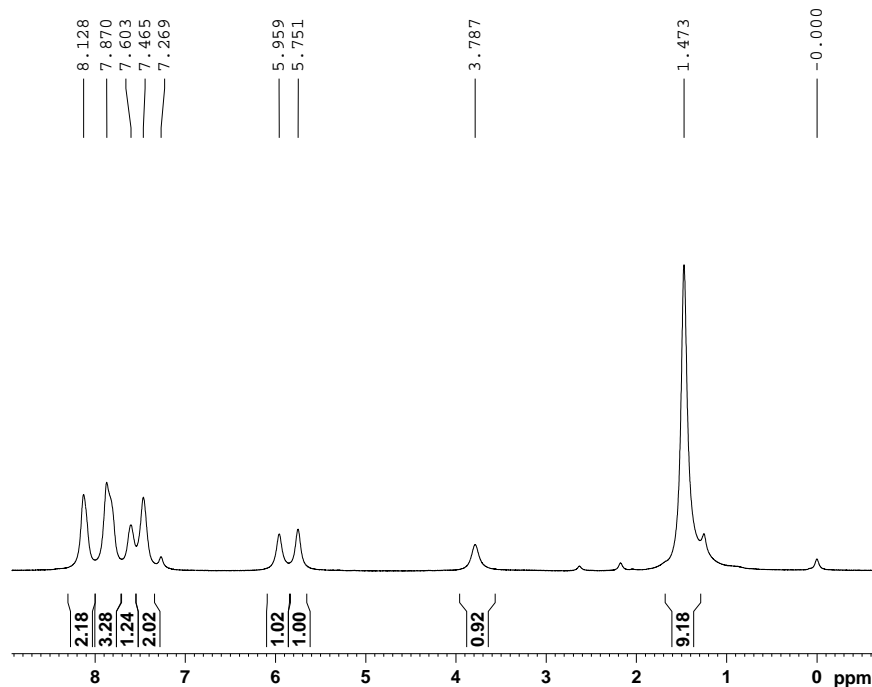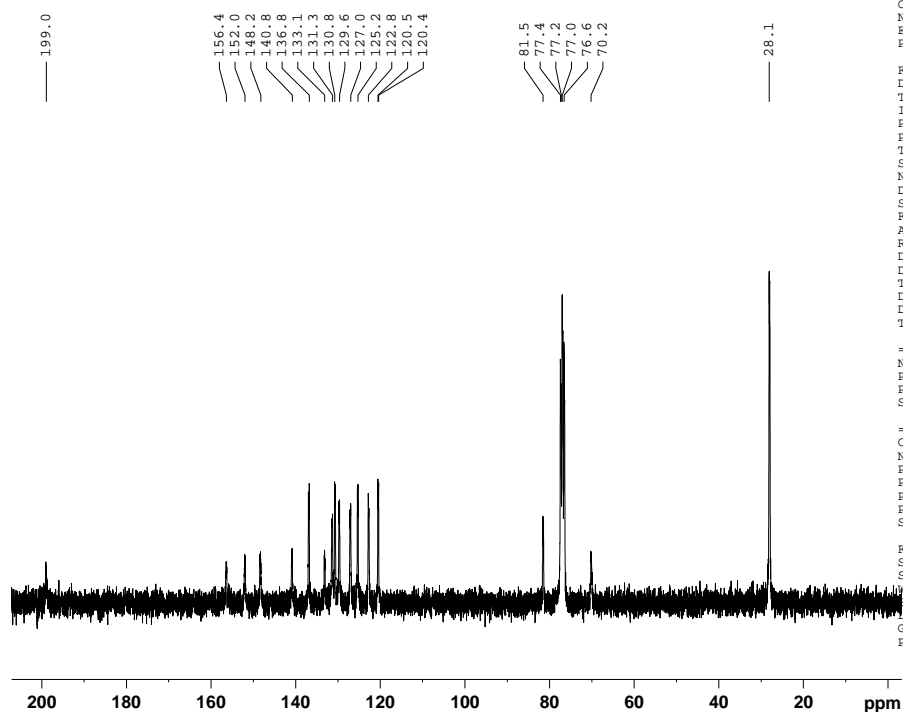

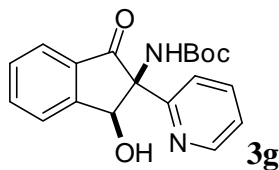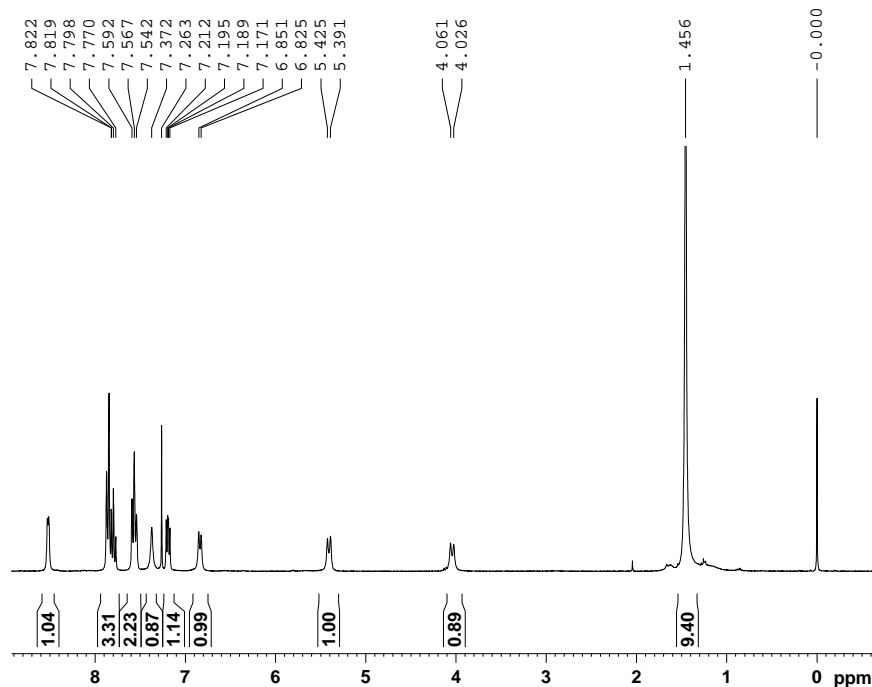

```

Current Data Parameters
NAME          sfq-585
EXPNO        40
PROCNO       1

F2 - Acquisition Parameters
Date_        20101103
Time         8.44
INSTRUM     spect
PROBHD      5 mm DUL 13C-1
PULPROG     zg30
TD          65536
SOLVENT     CDCl3
NS          16
DS          0
SWH         8992.806 Hz
FIDRES     0.137219 Hz
AQ         3.6438515 sec
RG         322.5
DW         55.600 usec
DE         8.00 usec
TE         295.7 K
D1         1.0000000 sec
TD0        1

===== CHANNEL f1 =====
NUC1        1H
P1          10.80 usec
PL1         3.00 dB
SFO1       300.1324010 MHz

F2 - Processing parameters
SI          32768
SF         300.1300051 MHz
WDW        EM
SSB        0
LB         0.30 Hz
GB         0
PC         1.00
    
```

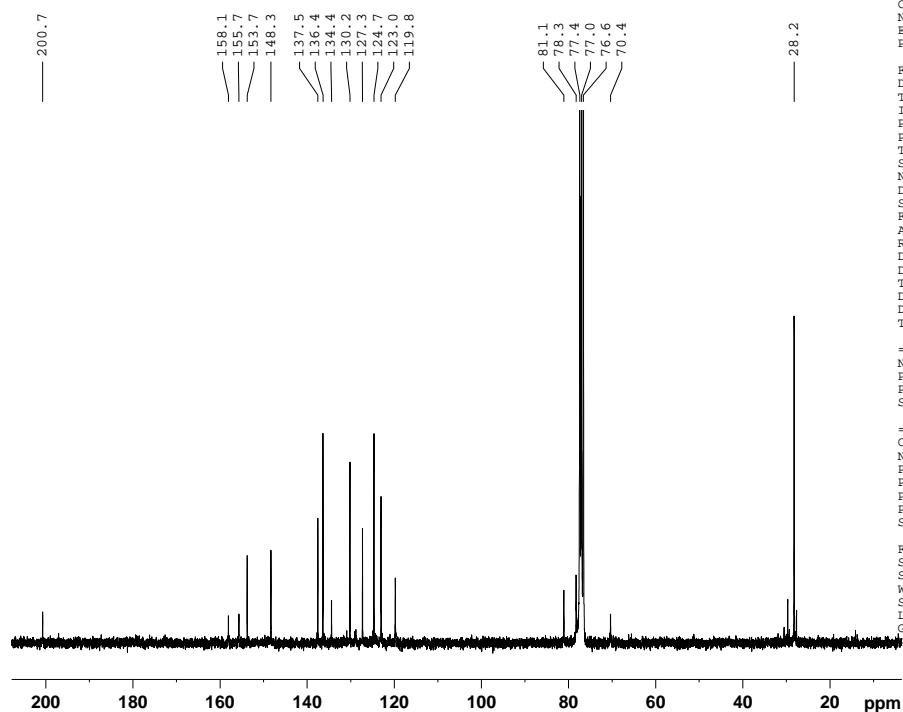

```

Current Data Parameters
NAME          sfq-585
EXPNO        100
PROCNO       1

F2 - Acquisition Parameters
Date_        20110106
Time         0.40
INSTRUM     spect
PROBHD      5 mm DUL 13C-1
PULPROG     zgpg30
TD          65536
SOLVENT     CDCl3
NS          6890
DS          4
SWH         17985.611 Hz
FIDRES     0.274439 Hz
AQ         1.8219508 sec
RG         4597.6
DW         27.800 usec
DE         8.00 usec
TE         292.0 K
D1         2.0000000 sec
D11        0.03000000 sec
TD0        1

===== CHANNEL f1 =====
NUC1        13C
P1          12.50 usec
PL1         2.00 dB
SFO1       75.4752953 MHz

===== CHANNEL f2 =====
CPDPRG2    waltz16
NUC2        1H
PCPD2      100.00 usec
PL2         3.00 dB
PL12       22.33 dB
PL13       23.00 dB
SFO2       300.1312005 MHz

F2 - Processing parameters
SI          32768
SF         75.4587616 MHz
WDW        EM
SSB        0
LB         1.00 Hz
GB         0
PC         1.40
    
```

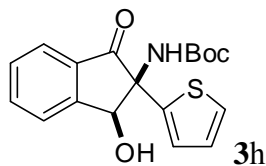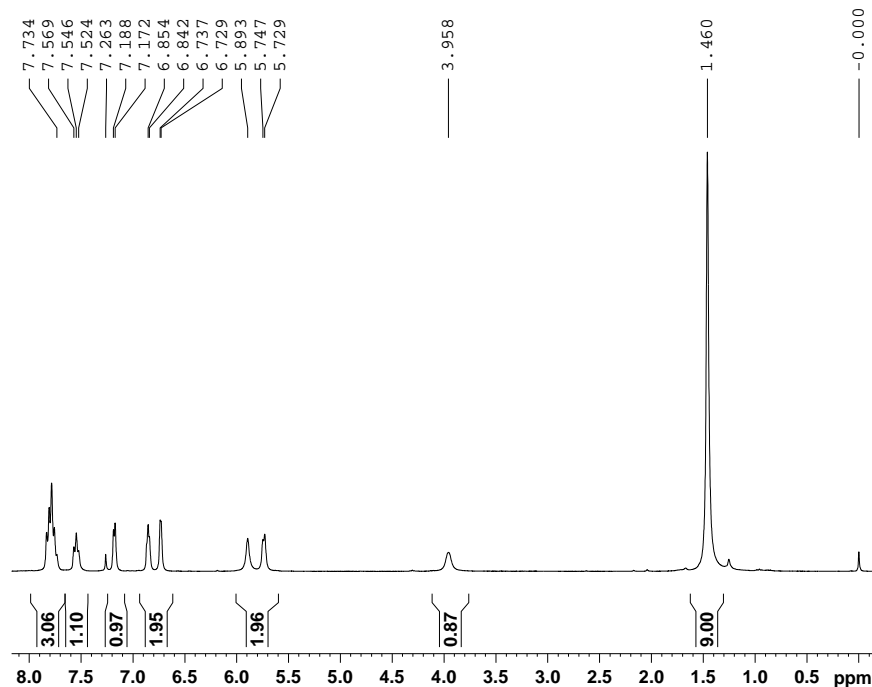

```

Current Data Parameters
NAME          sf9-646
EXPNO        30
PROCNO       1

F2 - Acquisition Parameters
Date_        20101230
Time         16.42
INSTRUM     spect
PROBHD      5 mm DUL 13C-1
PULPROG     zg30
TD          65536
SOLVENT     CDCl3
NS          13
DS          0
SWH         8992.806 Hz
FIDRES     0.137219 Hz
AQ         3.6438515 sec
RG          128
DW         55.600 usec
DE          8.00 usec
TE         292.4 K
D1         1.00000000 sec
TD0        1

===== CHANNEL f1 =====
NUC1        13C
P1         10.80 usec
PL1         3.00 dB
SFO1       300.1324010 MHz

F2 - Processing parameters
SI          32768
SF         300.1300049 MHz
WDW         EM
SSB         0
LB          0.30 Hz
GB          0
PC          1.00
    
```

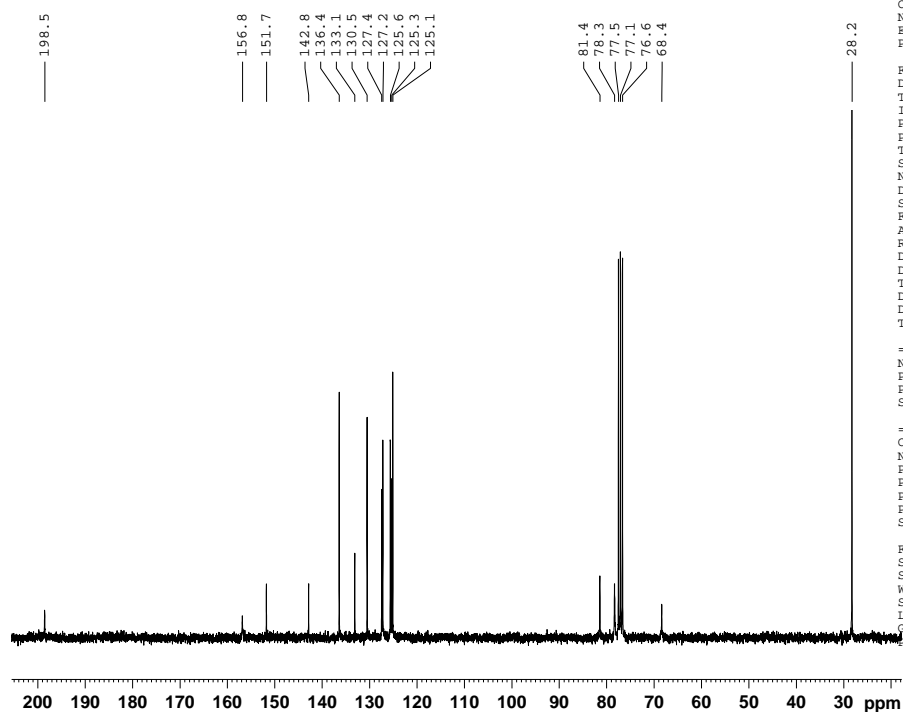

```

Current Data Parameters
NAME          sf9-646
EXPNO        31
PROCNO       1

F2 - Acquisition Parameters
Date_        20101230
Time         16.45
INSTRUM     spect
PROBHD      5 mm DUL 13C-1
PULPROG     zgpg30
TD          65536
SOLVENT     CDCl3
NS          409
DS          4
SWH         17985.611 Hz
FIDRES     0.274439 Hz
AQ         1.8219508 sec
RG          8192
DW         27.800 usec
DE          8.00 usec
TE         292.4 K
D1         2.00000000 sec
D11        0.03000000 sec
TD0        1

===== CHANNEL f1 =====
NUC1        13C
P1         12.50 usec
PL1         2.00 dB
SFO1       75.4752953 MHz

===== CHANNEL f2 =====
CPDPRG2     waltz16
NUC2        13C
PCPD2       100.00 usec
PL2         3.00 dB
PL12        22.33 dB
PL13        23.00 dB
SFO2       300.1312005 MHz

F2 - Processing parameters
SI          32768
SF         75.4677490 MHz
WDW         EM
SSB         0
LB          1.00 Hz
GB          0
PC          1.40
    
```

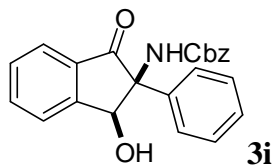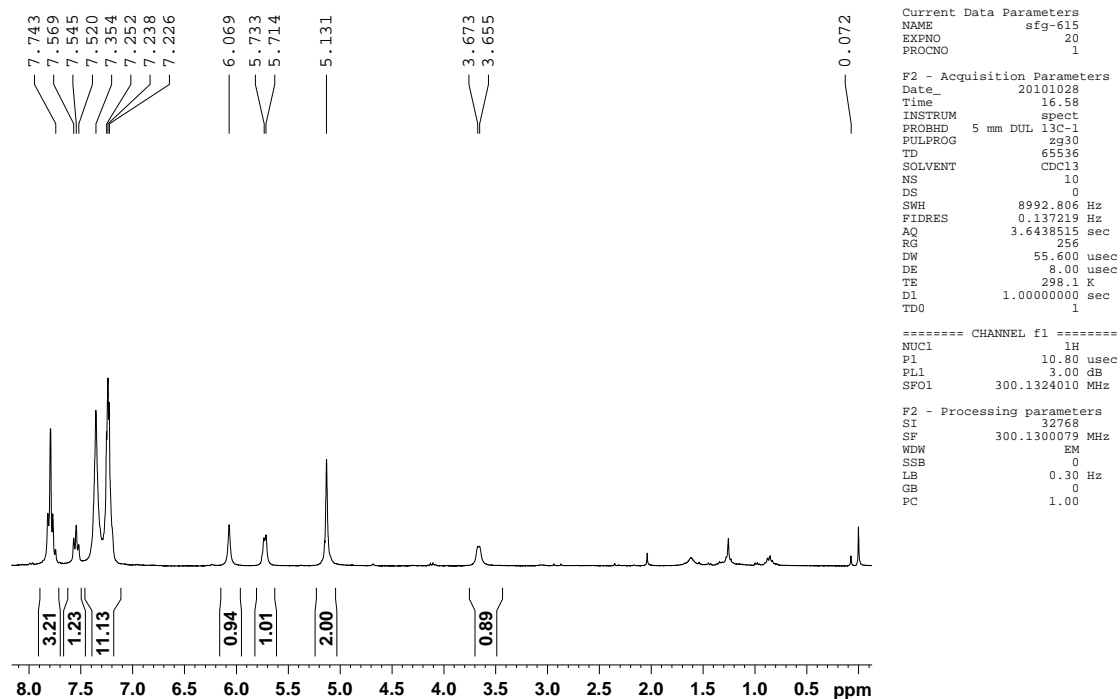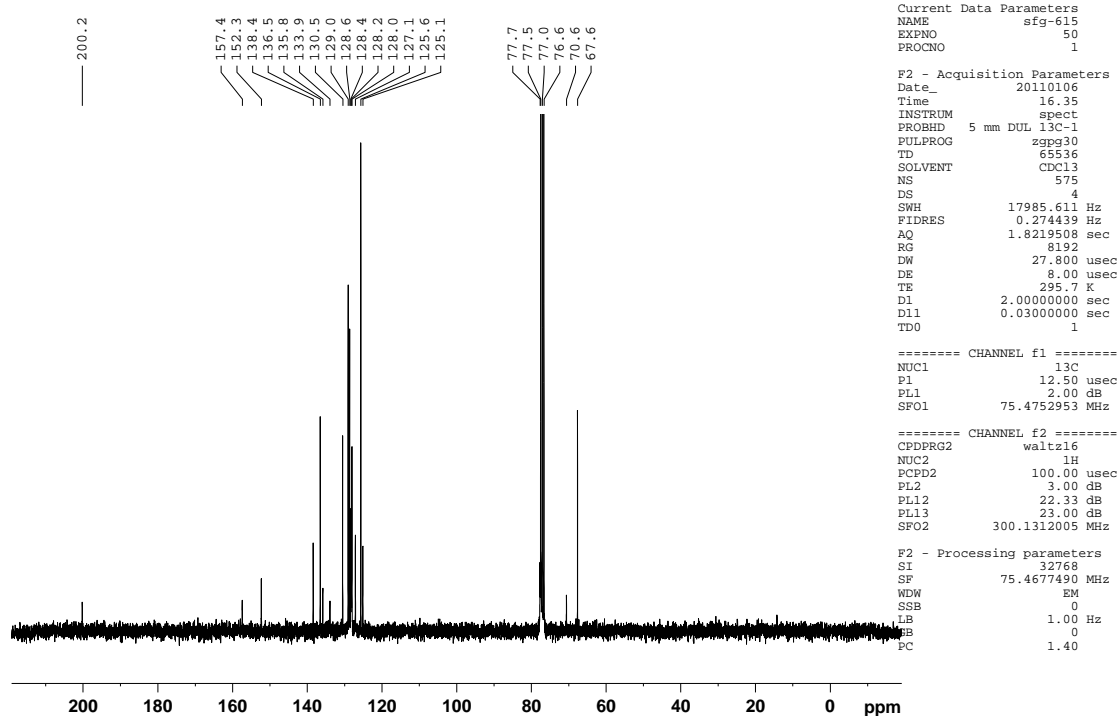

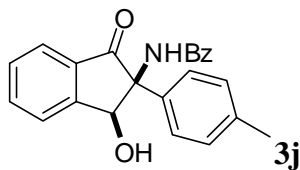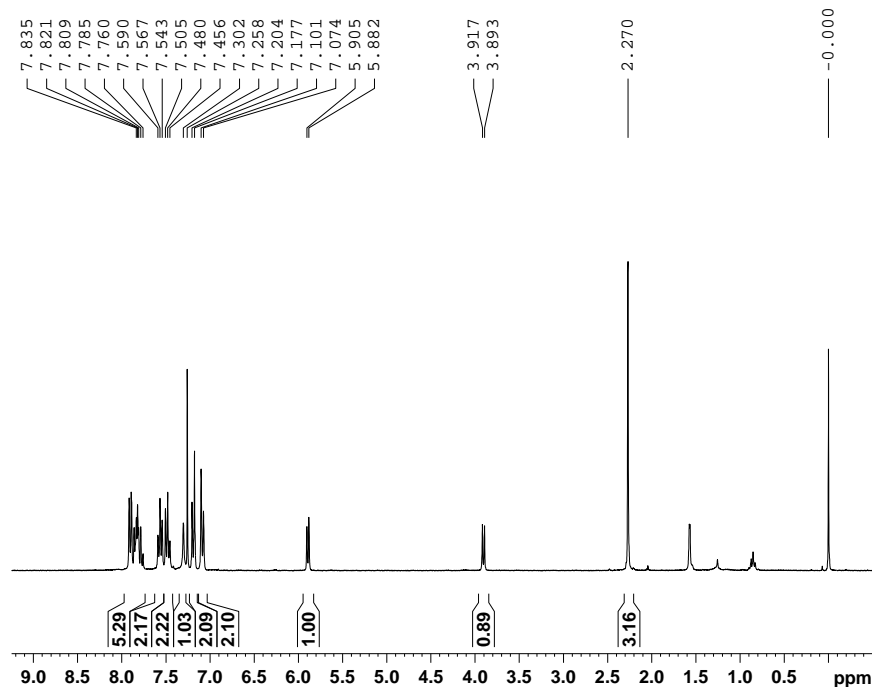

Current Data Parameters  
 NAME sfg-620  
 EXPNO 20  
 PROCNO 1

F2 - Acquisition Parameters  
 Date\_ 20101028  
 Time 17.02  
 INSTRUM spect  
 PROBHD 5 mm DUL 13C-1  
 PULPROG zg30  
 TD 65536  
 SOLVENT CDCl3  
 NS 16  
 DS 0  
 SWH 8992.806 Hz  
 FIDRES 0.137219 Hz  
 AQ 3.6438515 sec  
 RG 512  
 DW 55.600 usec  
 DE 8.00 usec  
 TE 297.9 K  
 D1 1.00000000 sec  
 TD0 1

===== CHANNEL f1 =====  
 NUC1 1H  
 P1 10.80 usec  
 PL1 3.00 dB  
 SFO1 300.1324010 MHz

F2 - Processing parameters  
 SI 32768  
 SF 300.1300066 MHz  
 WDW EM  
 SSB 0  
 LB 0.30 Hz  
 GB 0  
 PC 1.00

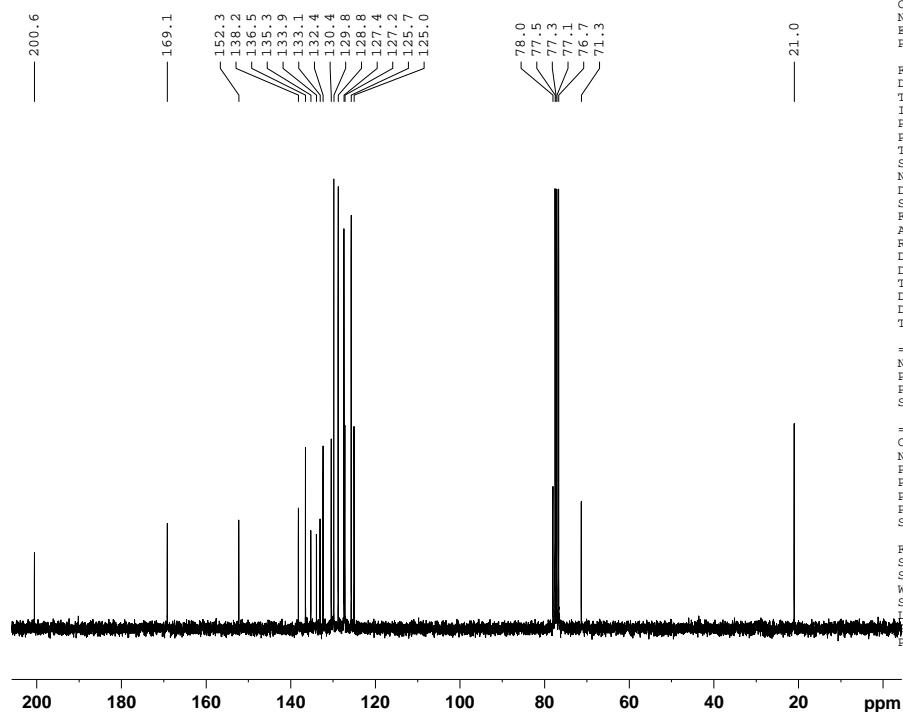

Current Data Parameters  
 NAME sfg-620  
 EXPNO 31  
 PROCNO 1

F2 - Acquisition Parameters  
 Date\_ 20101230  
 Time 16.01  
 INSTRUM spect  
 PROBHD 5 mm DUL 13C-1  
 PULPROG zgpg30  
 TD 65536  
 SOLVENT CDCl3  
 NS 171  
 DS 4  
 SWH 17985.611 Hz  
 FIDRES 0.274439 Hz  
 AQ 1.8219508 sec  
 RG 11585.2  
 DW 27.800 usec  
 DE 8.00 usec  
 TE 292.4 K  
 D1 2.00000000 sec  
 D11 0.03000000 sec  
 TD0 1

===== CHANNEL f1 =====  
 NUC1 13C  
 P1 12.50 usec  
 PL1 2.00 dB  
 SFO1 75.4752953 MHz

===== CHANNEL f2 =====  
 CPDPRG2 waltz16  
 NUC2 1H  
 PCPD2 100.00 usec  
 PL2 3.00 dB  
 PL12 22.33 dB  
 PL13 23.00 dB  
 SFO2 300.1312005 MHz

F2 - Processing parameters  
 SI 32768  
 SF 75.4677490 MHz  
 WDW EM  
 SSB 0  
 LB 1.00 Hz  
 GB 0  
 PC 1.40

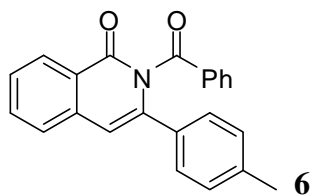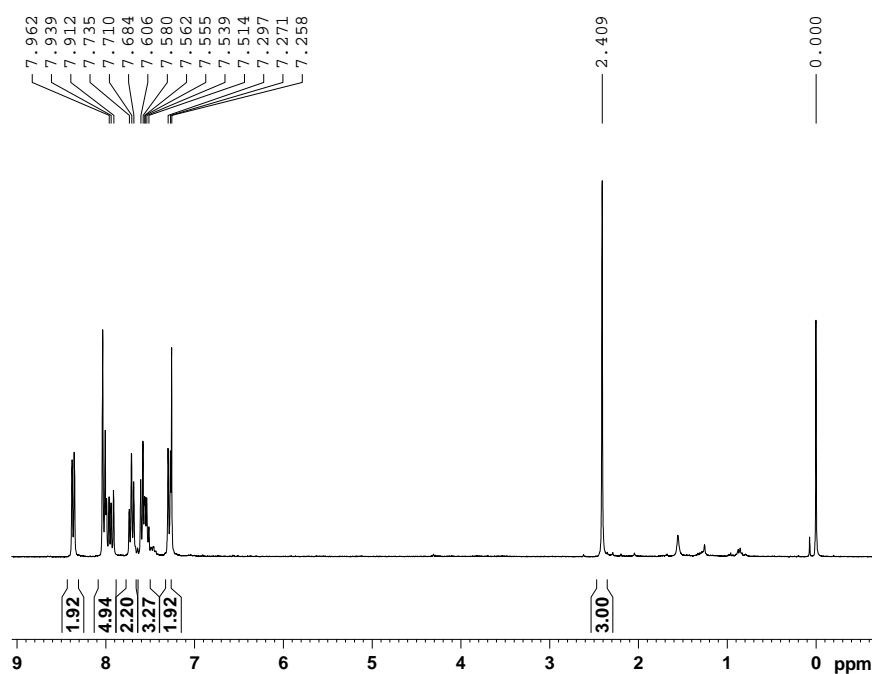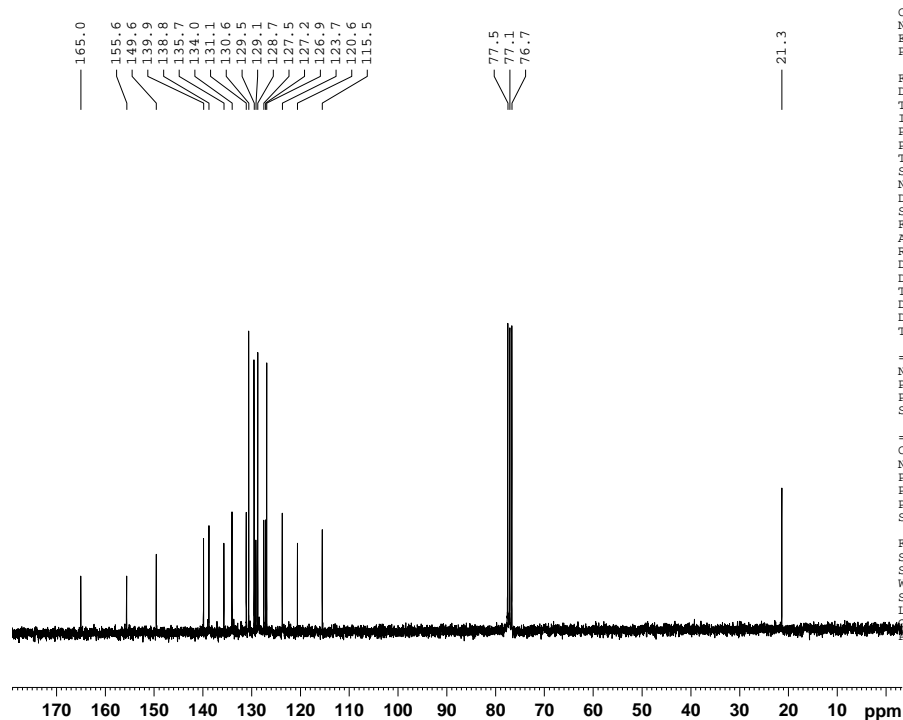

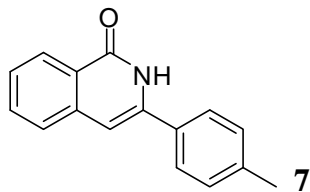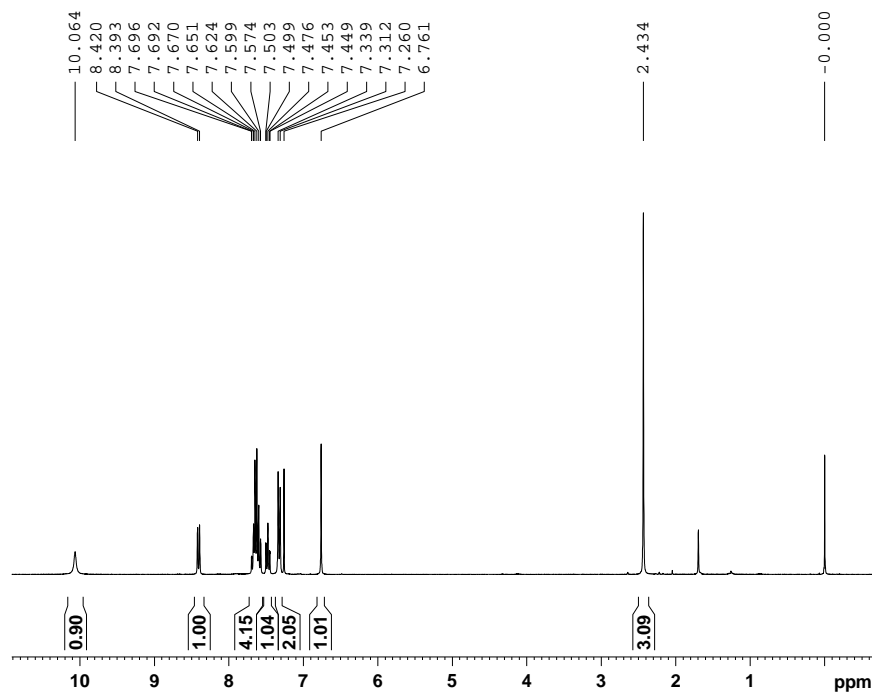

```

NAME      sfg-752
EXPNO     21
PROCNO    1
Date_     20110123
Time      9.31
INSTRUM   spect
PROBHD    5 mm DUL 13C-1
PULPROG   zg30
TD        32768
SOLVENT   CDCl3
NS        16
DS        0
SWH       8992.806 Hz
FIDRES    0.274439 Hz
AQ        1.8219508 sec
RG        362
DW        55.600 usec
DE        8.00 usec
TE        293.9 K
DL        2.0000000 sec
D1        1
TD0       1
    
```

```

===== CHANNEL f1 =====
NUC1      1H
P1        10.80 usec
PL1       3.00 dB
SFO1      300.1318008 MHz
SI        32768
SF        300.1300061 MHz
WDW       EM
SSB       0
LB        0.30 Hz
GB        0
PC        1.00
    
```

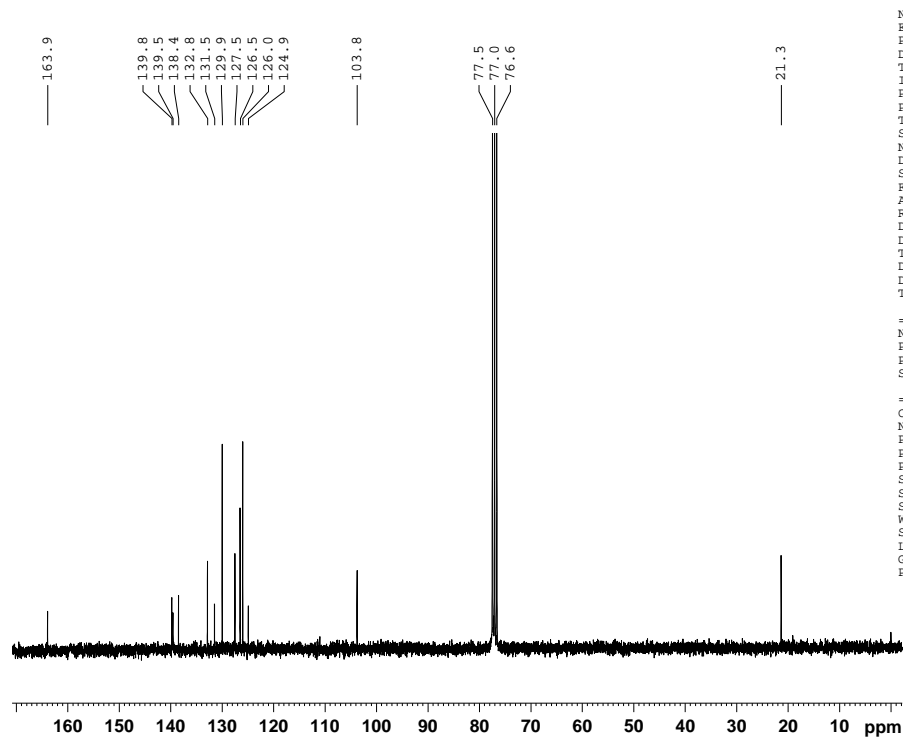

```

NAME      sfg-752
EXPNO     11
PROCNO    1
Date_     20110123
Time      9.45
INSTRUM   spect
PROBHD    5 mm DUL 13C-1
PULPROG   zgpg30
TD        32768
SOLVENT   CDCl3
NS        680
DS        0
SWH       18832.393 Hz
FIDRES    0.574719 Hz
AQ        0.8700404 sec
RG        4096
DW        26.550 usec
DE        8.00 usec
TE        294.7 K
DL        2.0000000 sec
D11       0.03000000 sec
D1        1
TD0       1
    
```

```

===== CHANNEL f1 =====
NUC1      13C
P1        12.50 usec
PL1       2.00 dB
SFO1      75.4752953 MHz
    
```

```

===== CHANNEL f2 =====
CPDPRG2   waltz16
NUC2      1H
PCPD2     100.00 usec
PL2       3.00 dB
PL12      22.33 dB
SFO2      300.1312005 MHz
SI        32768
SF        75.4677490 MHz
WDW       EM
SSB       0
LB        1.00 Hz
GB        0
PC        1.40
    
```
